# Supplementary material
Source: PubMed Central journal article supplement (PMC6175280)
Supplement: NIHMS981419-supplement-Sup_Fig.pdf [file NIHMS981419-supplement-Sup_Fig.pdf]

**Molecular Cell, Volume 69**

**Supplemental Information**

**Transcriptional Pause Sites Delineate**

**Stable Nucleosome-Associated Premature**

**Polyadenylation Suppressed by U1 snRNP**

**Anthony C. Chiu, Hiroshi I. Suzuki, Xuebing Wu, Dig B. Mahat, Andrea J. Kriz, and Phillip A. Sharp**

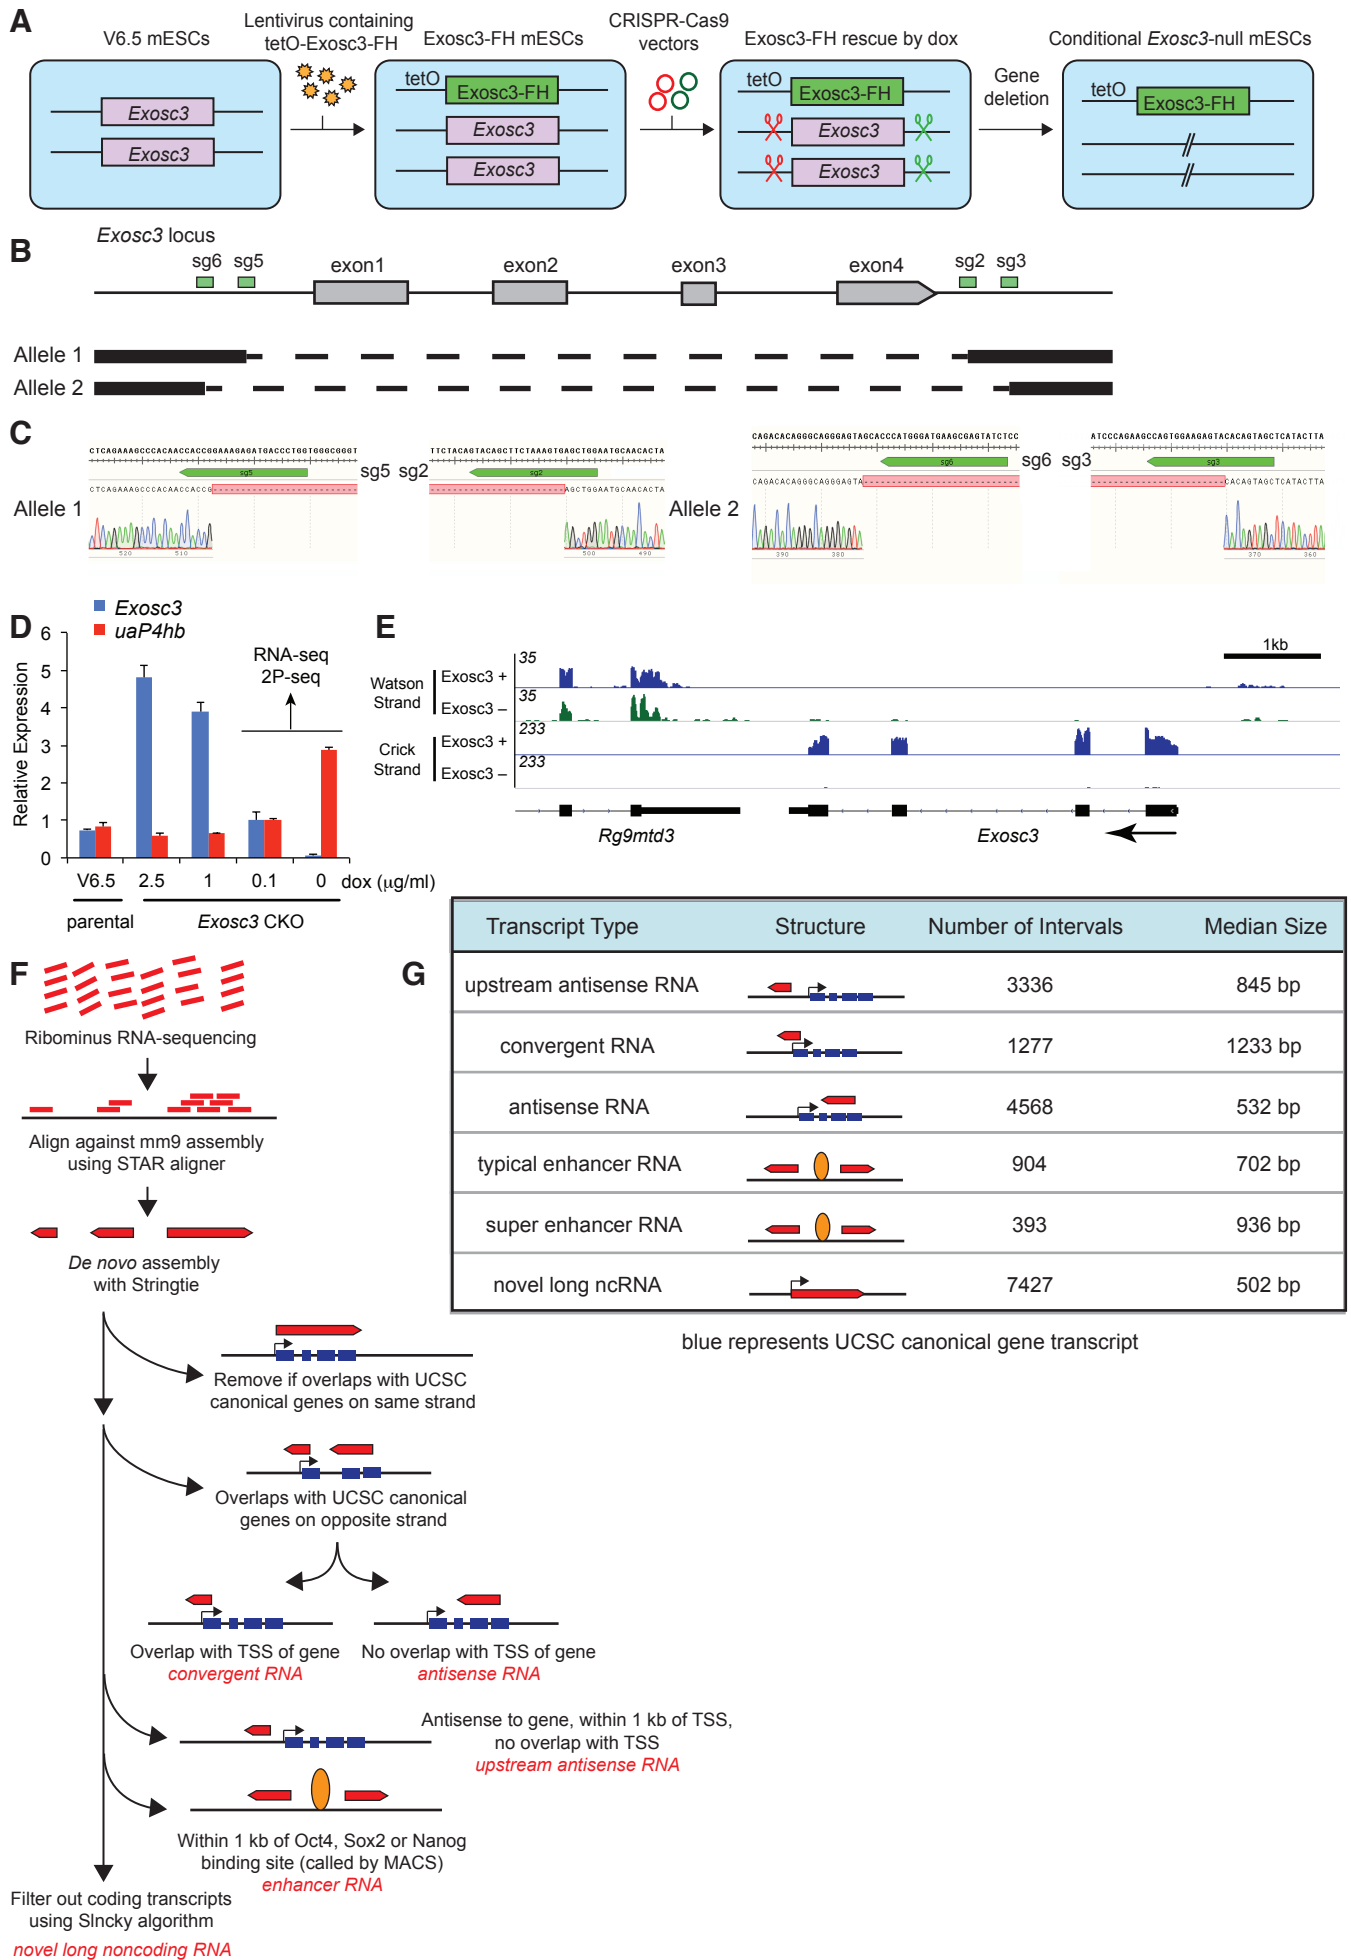

**Figure S1. Development of *Exosc3* conditional deletion system and *de novo* transcriptome assembly, related to Figure 1.**

(A) Generation of *Exosc3* CKO mESCs.

(B) Design of CRISPR-Cas9 sgRNAs targeting endogenous *Exosc3* gene.

(C) Sanger sequencing of PCR products across CRISPR target sites validating deletion of endogenous *Exosc3*.

(D) qRT-PCR of spliced *Exosc3* mRNA and uaRNA *uaP4hb*. Plotted is the mean from 3 biological replicates; error bars represent standard error.

(E) Genome browser shot of RNA-seq reads at *Exosc3* upon removal of dox showing confirmation of specific loss of *Exosc3* transcripts.

(F) Strategy for *de novo* transcriptome assembly and interval classification.

(G) Properties of intervals defined by *de novo* transcriptome assembly.

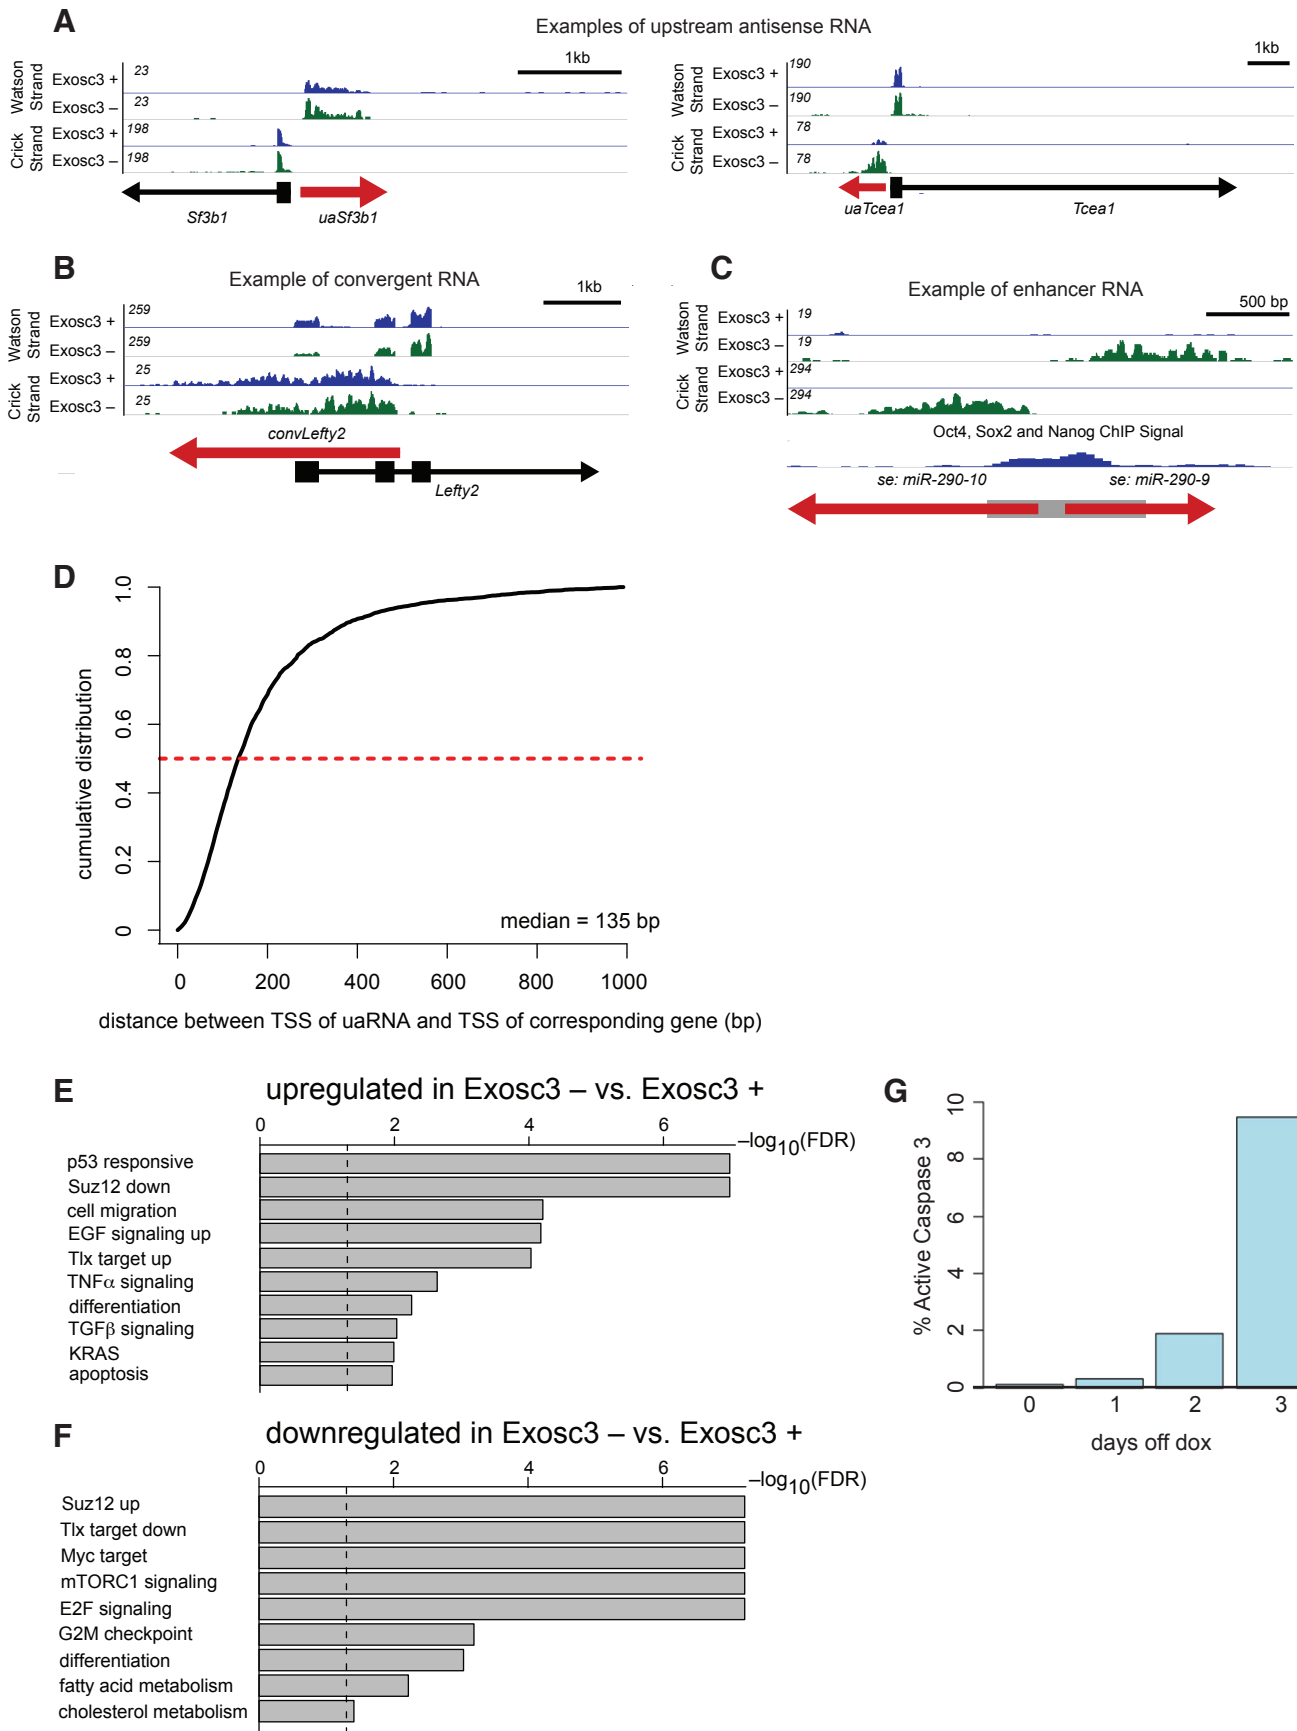

**Figure S2. Characterization of Exosc3-targeted RNA classes, related to Figure 1.**

(A-C) Genome browser shots of representative examples of newly defined intervals (red) for upstream antisense RNAs (A), convergent RNA (B), and enhancer RNA (C). RNA-seq reads are illustrated as Exosc3 + (blue) and Exosc3 – (green). For the enhancer RNA, the grey box represents the ChIP peaks of the combined binding profiles of Oct4, Sox2, and Nanog transcription factors defined by MACS.

(D) Cumulative distribution of the distance between the TSS of uaRNAs and the TSS of their corresponding mRNAs. Red dashed line represents where the cumulative distribution would be the median.

(E, F) Boxplot showing selected statistically significant pathways identified by gene set enrichment analysis (GSEA) for genes upregulated (E) or downregulated (F) upon Exosc3 loss. Dotted line represents false discovery rate of 0.05.

(G) Percent of cells that are positive for active caspase 3 by FACS analysis.

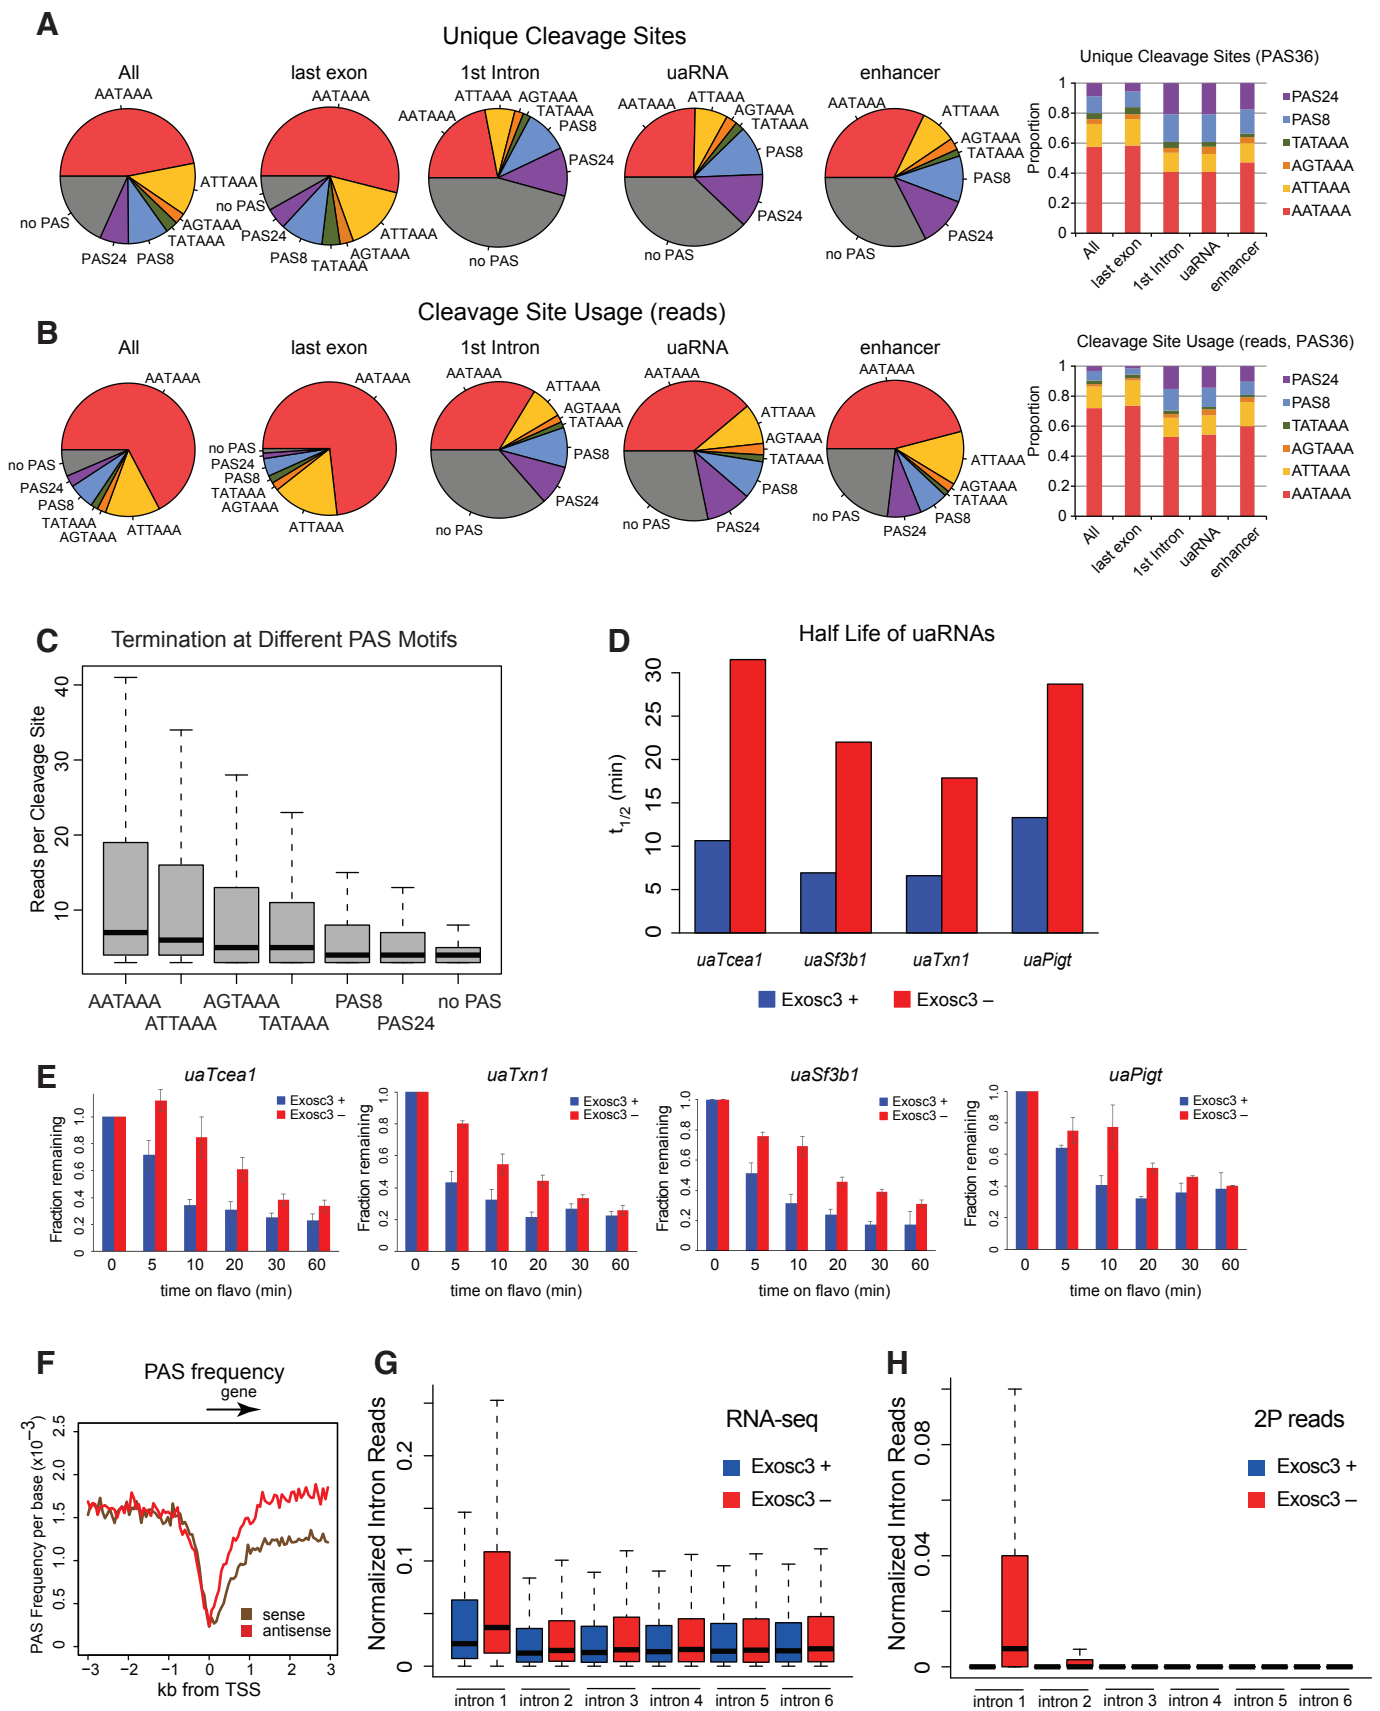

**Figure S3. PAS termination at TSS proximal region, related to Figures 1 and 2.**

(A) Pie chart showing distribution of various PAS motifs for all uniquely detected cleavage sites (left). Right panel shows distribution of 36 PAS motifs.

(B) Pie chart showing distribution of various PAS motifs for all detected cleavage site reads (left). Right panel shows distribution of 36 PAS motifs.

(C) Boxplot showing number of reads for each cleavage sites sorted by type of PAS motif. Tails reflect 95<sup>th</sup> percentile.

(D) Half-lives of uaRNAs, determined by qRT-PCR analysis of cells with or without dox, further treated with 1  $\mu$ M flavopiridol, as shown in panel (E).

(E) Relative abundance of uaRNAs from oligo-dT primed cDNA after treatment with 1  $\mu$ M flavopiridol in Exosc3 + (blue) or Exosc3 – (green) mESCs, determined by qRT-PCR analysis. Plotted is the mean from 3 biological replicates; error bars represent standard error.

(F) Frequency of predicted canonical PAS motifs (AATAAA/ATTAAA) flanking TSS on sense (brown) or antisense strand (red).

(G) Boxplot showing normalized RNA-seq reads ( $\text{FPKM}_{\text{intron N reads}}/\text{FPKM}_{\text{mature transcript reads}}$ ) for UCSC canonical genes with at least 6 introns.

(H) Boxplot showing normalized intronic cleavage site reads (Sum of 2P reads in intron N/sum of 2P reads in last exon) for UCSC canonical genes with at least 6 introns.

Figure S4

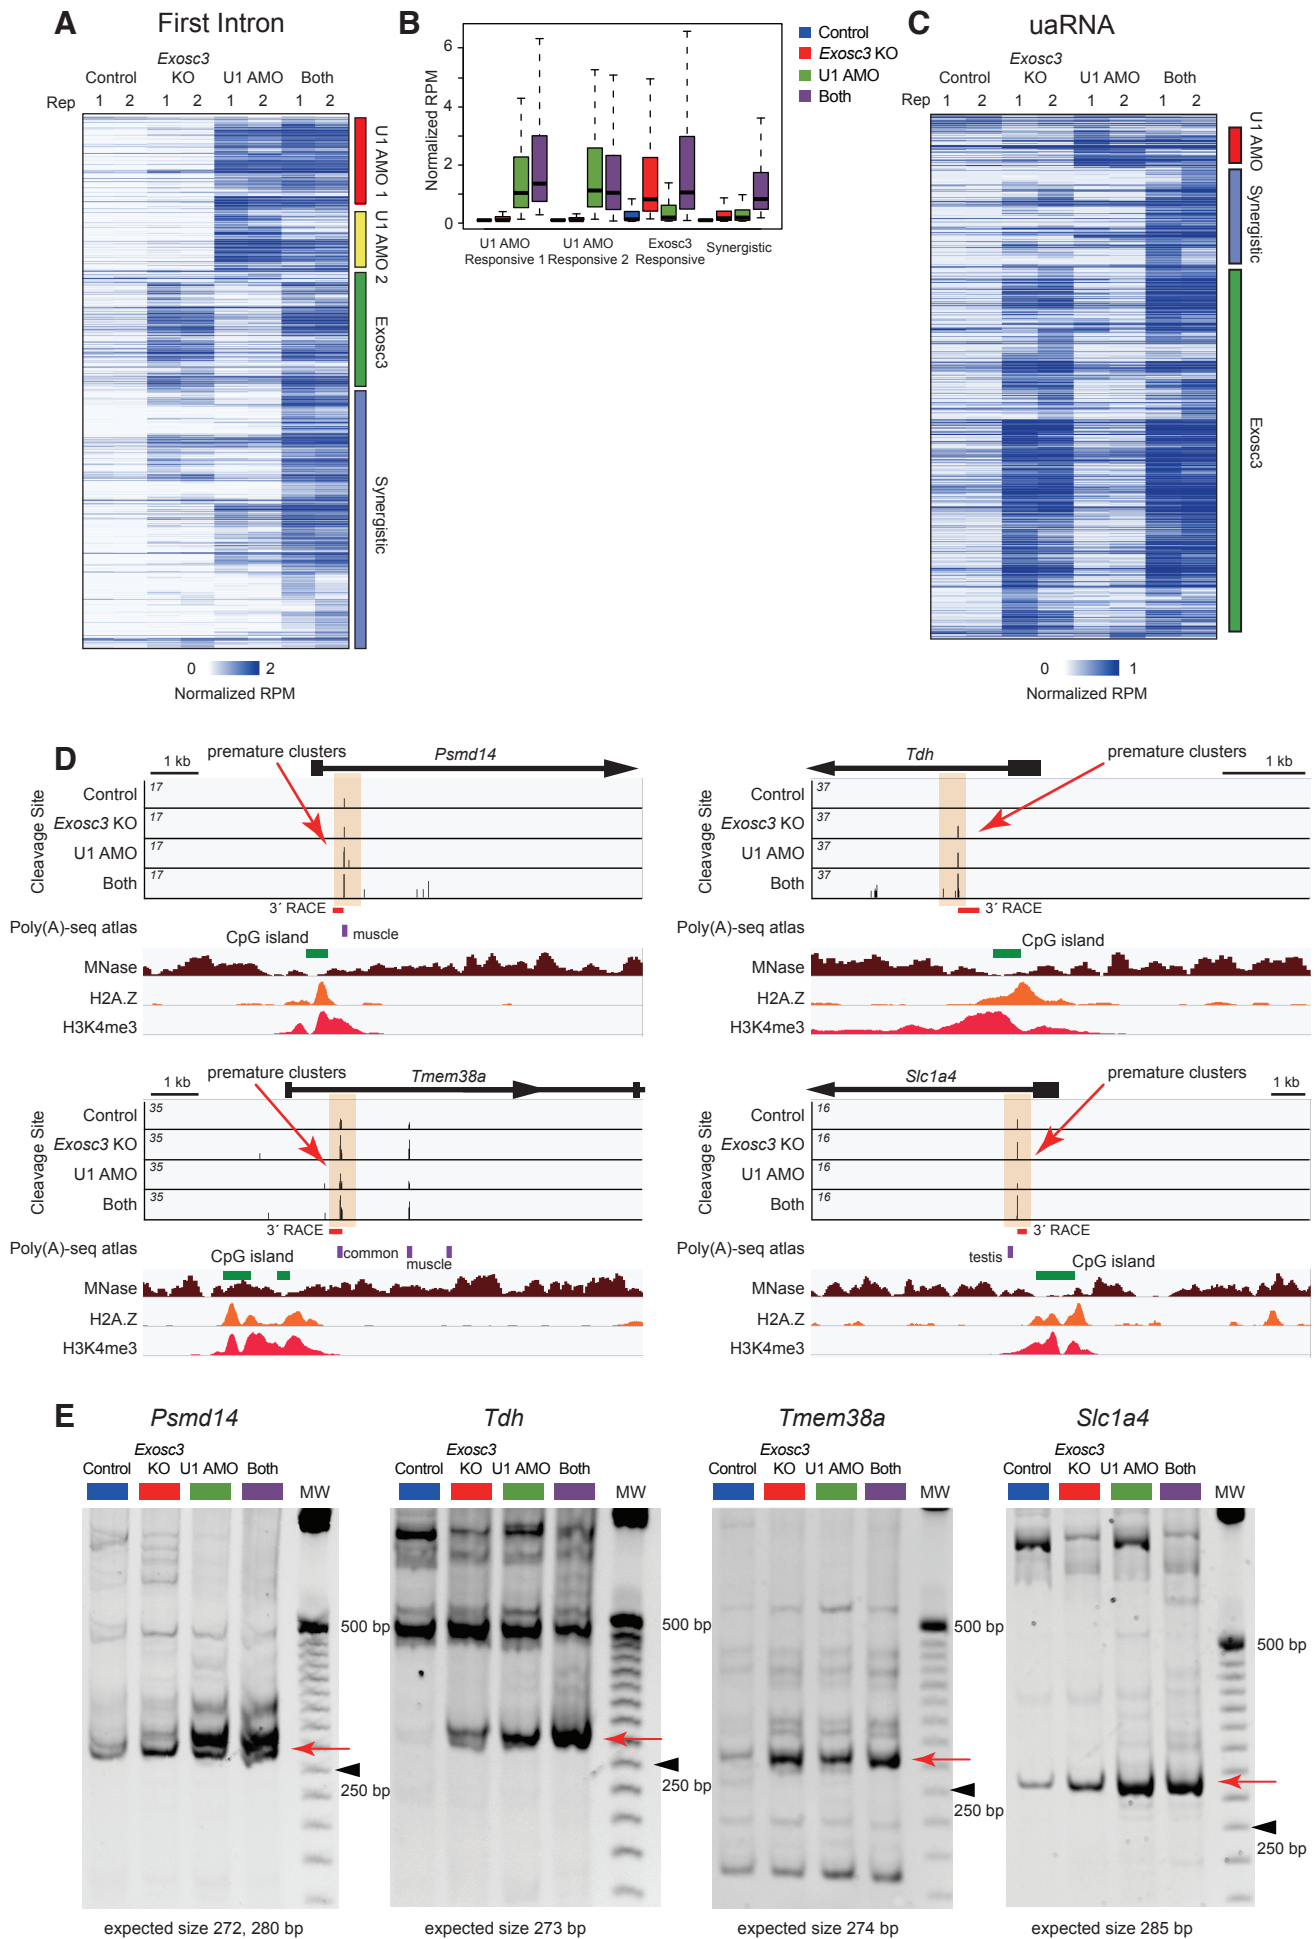



**Figure S4. Effects of U1 inhibition and Exosc3 depletion on PAS termination, related to Figure 3.**

(A) Heatmap of library-size normalized RPM for hierarchically clustered PAS-linked cleavage clusters within the first intron.

(B) Boxplot showing normalized RPM for 4 identified clusters in panel (A).

(C) Heatmap of library-size normalized RPM for hierarchically clustered PAS-linked cleavage clusters within uaRNAs.

(D) Genome browser shot of *Psmc14*, *Tdh*, *Tmem38a*, and *Slc1a4* showing PAS-linked cleavage sites (top, orange shade), annotated CpG island (green), MNase-seq (brown), H2A.Z ChIP-seq (orange), and H3K4me3 ChIP-seq (red). Previously reported PAS sites in mouse tissues (purple) and PCR products are also shown.

(E) Nested 3' RACE analysis of four other premature termination events (*Psmc14*, *Tdh*, *Tmem38a*, and *Slc1a4*) on a nondenaturing polyacrylamide gel. Red arrows indicate most frequent termination sites, which have been sequence validated. Molecular weight ladder is 25 bp ladder, and black arrowheads indicate 250 bp.

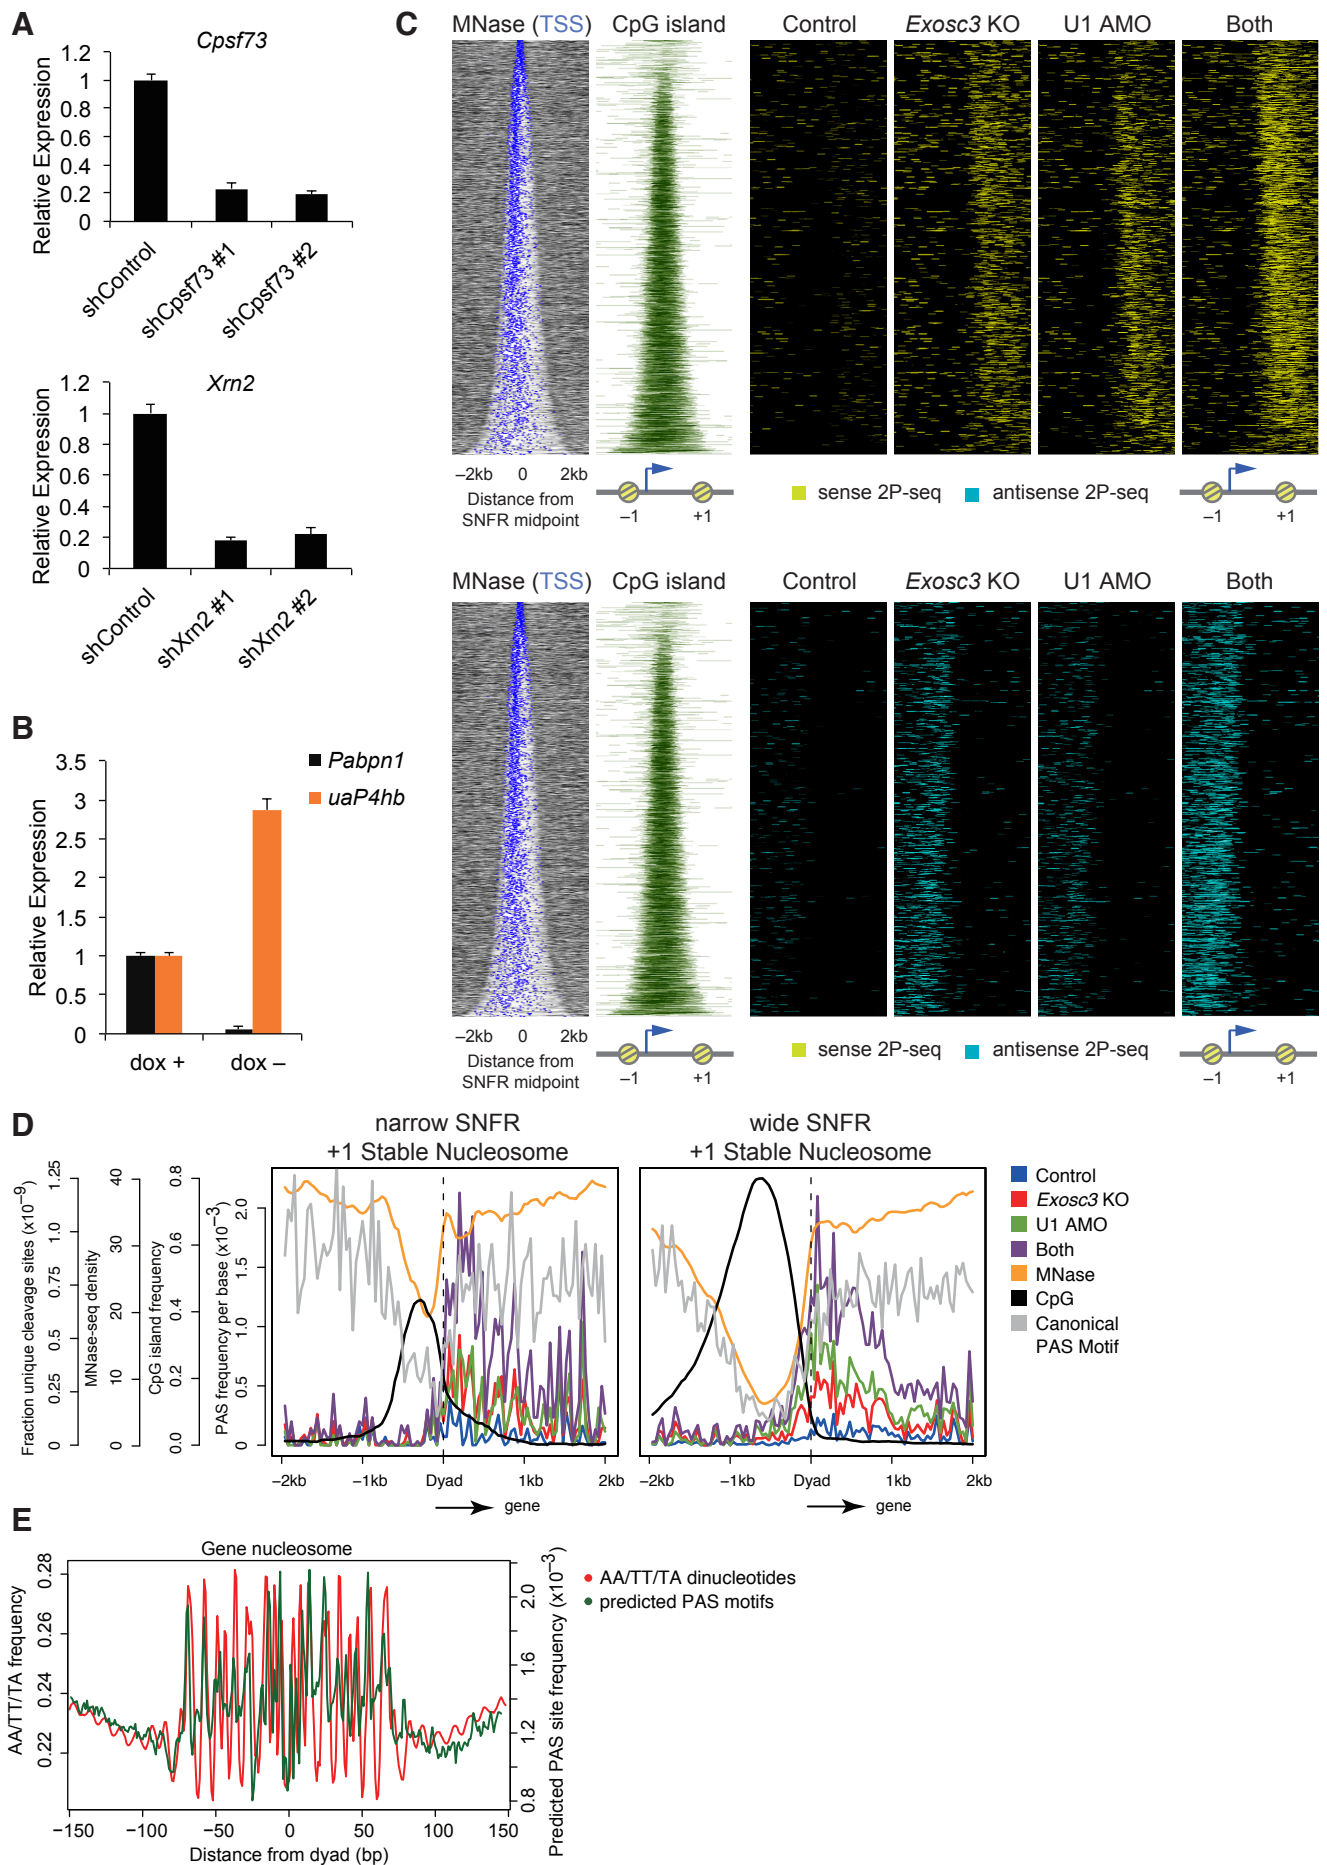

**Figure S5. PAS termination and -1/+1 stable nucleosomes, related to Figures 3 and 4.**

(A) Knockdown of *Cpsf73* and *Xrn2*, validated by qRT-PCR analysis. Plotted is the mean from 3 biological replicates; error bars represent standard error.

(B) Generation of conditional *Pabpn1* knockout mESCs. qRT-PCR results of *Pabpn1* mRNA and uaRNA *uaP4hb* are shown. Plotted is the mean from 3 biological replicates; error bars represent standard error.

(C) Heatmap of MNase-seq, CpG islands, and PAS-linked cleavage sites (top: sense 2P-seq reads, bottom: antisense 2P-seq reads) around a 2 kb window flanking the SNFR midpoint for non-overlapping expressed genes with 2P clusters, ranked by increasing SNFR width.

(D) Metaplots of PAS-linked cleavage sites, MNase-seq, CpG islands, and predicted canonical PAS motifs around the dyad axis of the +1 stable nucleosome of genes with narrow SNFR (< 750 bp, left) and wide SNFR (> 750 bp, right).

(E) AA/TT/TA dinucleotide frequency (red) and frequency of predicted canonical PAS motifs (green) per gene body nucleosome in a 150 bp window from chemical mapping-defined dyad axis. Gene body nucleosomes are between TSS and 2 kb upstream from the TES of genes.

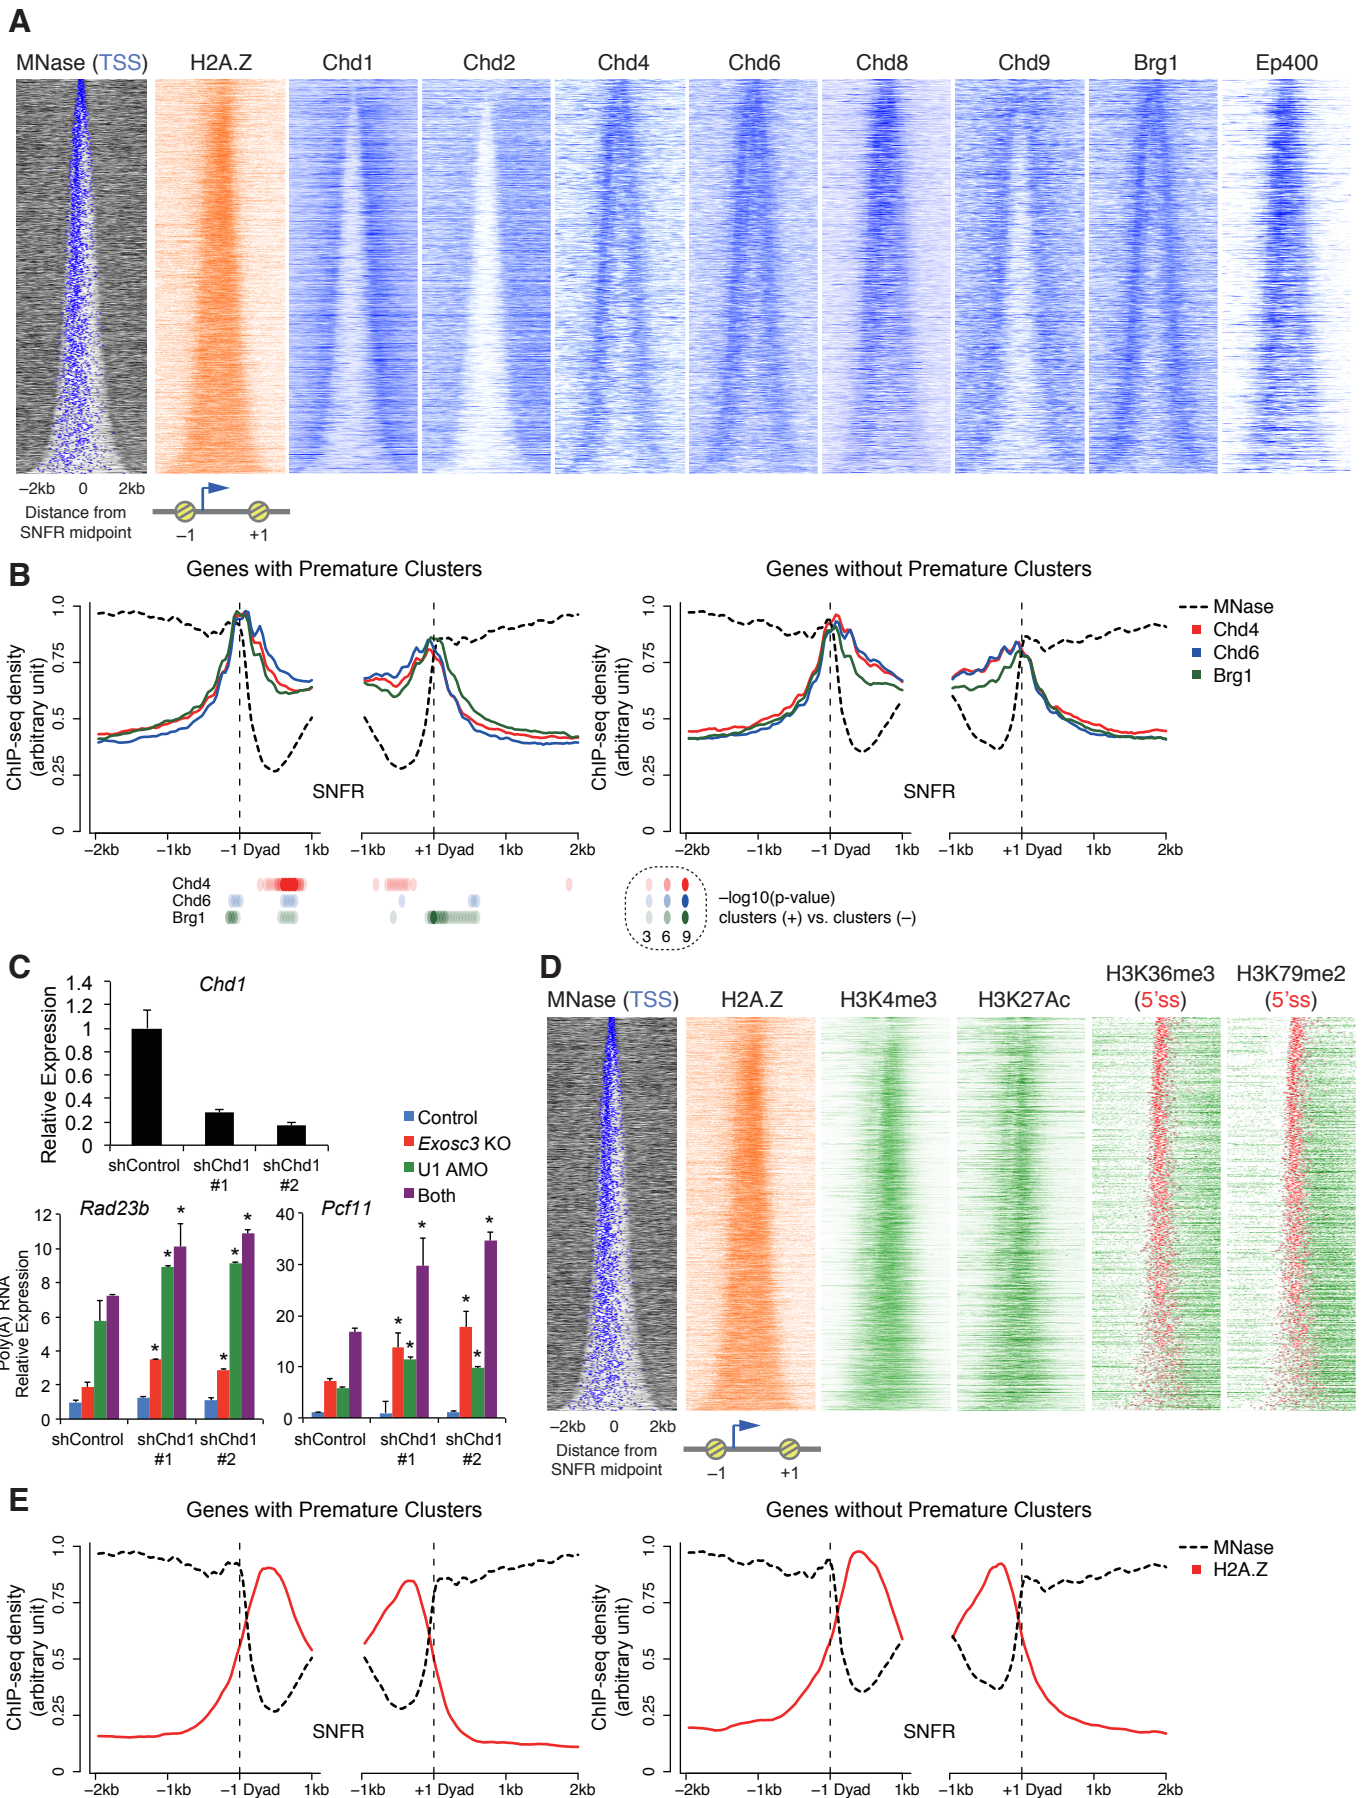

**Figure S6. Distribution of chromatin remodelers and histone modification around –1/+1 stable nucleosomes, related to Figure 5.**

(A) Heatmap of ChIP-seq signal for various chromatin remodelers in a 2 kb window flanking the SNFR midpoint for non-overlapping expressed genes, ranked by increasing SNFR width. Chd1 prefers +1 stable nucleosomes, whereas several factors such as Ep400 and Chd4 prefer –1 stable nucleosomes.

(B) Read coverage of MNase-seq and chromatin remodelers ChIP-seq in a –2 kb to +1 kb window around the –1 stable nucleosome dyad axis and –1 kb to +2 kb window around the +1 stable nucleosome dyad axis, separated for genes with premature intron clusters (left) and expression-matched genes without premature intron clusters (right). Chd4, Chd6, and Brg1 do not show clear differences between two gene sets. P values with K-S test at each bin for each factor are displayed.

(C) Top: knockdown of Chd1, validated by qRT-PCR analysis. Bottom: effects of knockdown of Chd1 on induction of premature polyadenylated transcripts of *Rad23b* and *Pcf11*, determined by qRT-PCR using the fusion primer covering gene-specific sequence and poly(A) tail. Plotted is the mean from 3 biological replicates; error bars represent standard error. \*  $P < 0.05$ , compared to shControl.

(D) Heatmap of ChIP-seq signal for various histone marks in a 2 kb window flanking the SNFR midpoint for non-overlapping expressed genes, ranked by increasing SNFR width. H2A.Z is enriched over SNFR region upstream of cleavage signals. H3K4me3 and H3K27ac were also enriched within the SNFR. Histone marks of productive elongation (H3K36me3 and H3K79me2) were found mostly in the downstream sense orientation.

(E) Read coverage of MNase-seq and H2A.Z ChIP-seq in a –2 kb to +1 kb window around the –1 stable nucleosome dyad axis and –1 kb to +2 kb window around the +1 stable nucleosome dyad axis, separated for genes with premature intron clusters (left) and expression-matched genes without premature intron clusters (right). H2A.Z do not show clear differences between two gene sets.

Sources of the datasets are described in Table S2.

Figure S7

Chiu et al.

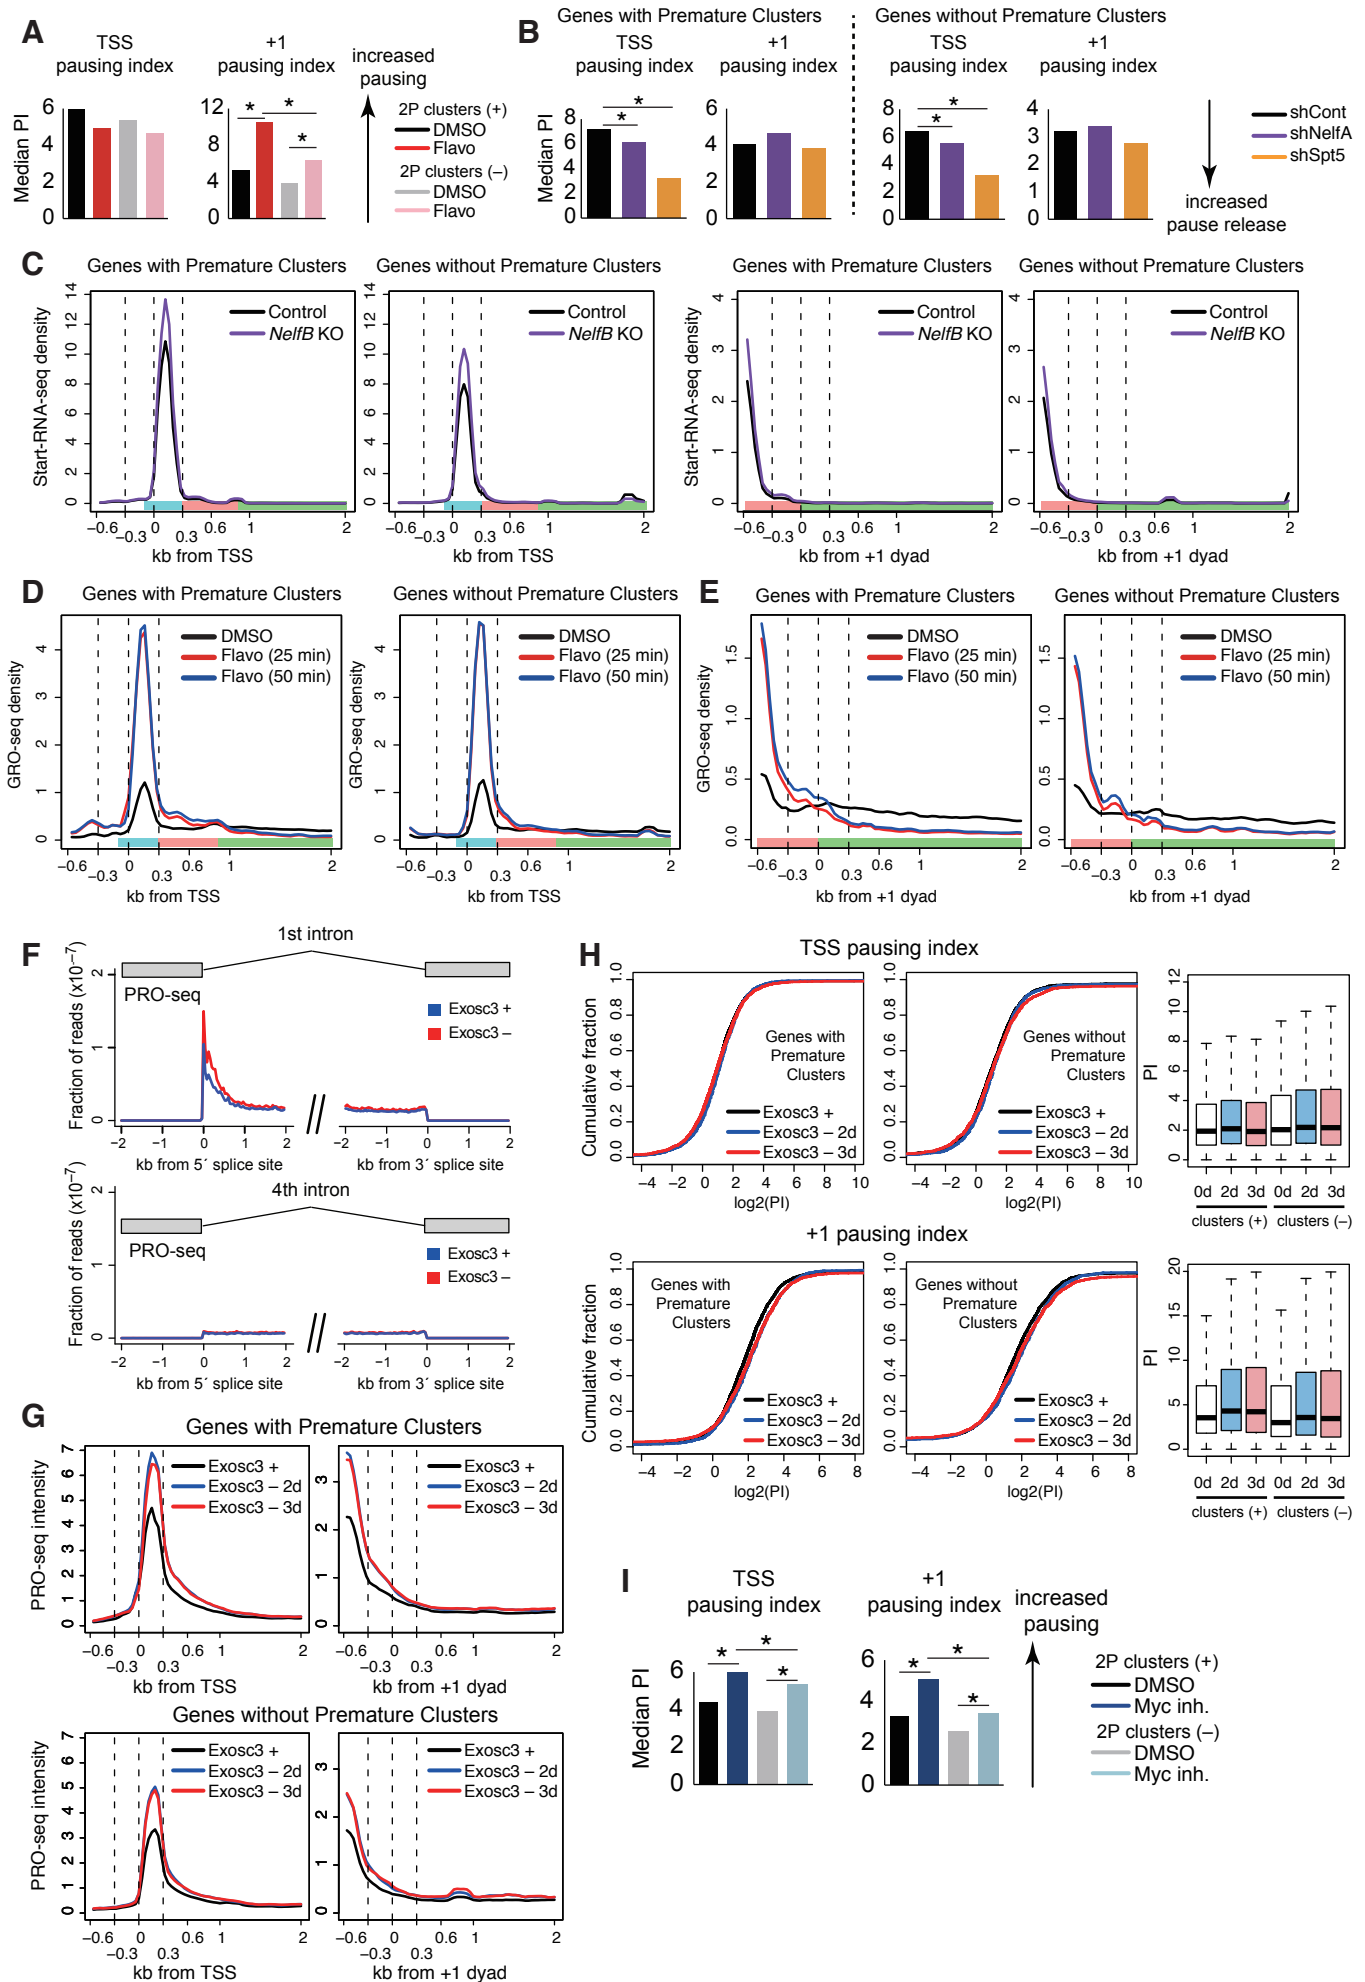

**Figure S7. Analysis of TSS and +1 nucleosome pausing and pausing effects by Exosc3 depletion, related to Figures 6 and 7.**

(A, B) Comparison of TSS pausing index and +1 nucleosome pausing index shown in Figures 6E and 6G. The median pausing indices are shown in a raw scale. \*  $P < 0.01$  with K-S test.

(C) Metaplots of Start-RNA-seq density around the TSS or +1 dyad of wide SNFR genes in control and *NelfB* KO mESCs. StartRNA-seq datasets (Williams et al., 2015) was reanalyzed. Start-RNA-seq captures nascent capped short, less than 200 nts, RNA species, and read coverage is restricted to the TSS proximal regions in contrast to GRO-seq. Thus, it is difficult to detect +1 nucleosome-associated pause for wide SNFR genes, where the distances between the TSS and nucleosome-related pause sites are longer than 200 nts, in Start-RNA-seq datasets. Even with this limitation, Start-RNA-seq reads are higher in genes with premature clusters than genes without. In addition, depletion of NelfB resulted in slight increase of Start-RNA-seq reads in both gene sets with/without premature clusters.

(D) Metaplots of density of GRO-seq (Jonkers et al., 2014) around the TSS with flavopiridol treatment.

(E) Metaplots of density of GRO-seq (Jonkers et al., 2014) around the +1 dyad with flavopiridol treatment.

(F) Mean exon-removed PRO-seq signal flanking 5' or 3' splice sites for the first or fourth intron for Exosc3 + or Exosc3 - (dox off 3 days) samples, normalized by library depth.

(G) Metaplots of PRO-seq density around the TSS (left) or +1 dyad (right) for genes with 2P clusters (top) and expression-matched genes without 2P cluster (bottom) in Exosc3 + and Exosc3 - mESCs (dox off 2 and 3 days).

(H) Cumulative distribution plot of  $\log_2$ (pausing index) of the TSS (top) or +1 stable nucleosome pause (bottom) for genes with 2P clusters (left) and expression-matched genes without 2P clusters (right) in Exosc3 + and Exosc3 - mESCs (dox off 2 and 3 days). Right boxplots show distribution of pausing indices.

(I) Comparison of TSS pausing index and +1 nucleosome pausing index shown in Figure 7C. The median pausing indices are shown in a raw scale. \*  $P < 0.01$  with K-S test.

## **SUPPLEMENTAL TABLES**

**Table S1, related to Figures 1, 2, 3, and 5.**

**sgRNA and primer information.**

**Table S2, related to Figures 1-7.**

**Information about the datasets used in this study.**
